# Supplementary material for: Transient receptor potential vanilloid 1 and 4 double knockout leads to increased bone mass in mice
Source: PubMed Central journal article supplement (PMC7191598; doi:10.1016/j.bonr.2020.100268), 2020-04-23
Supplement: mmc2.pdf [file mmc2.pdf]

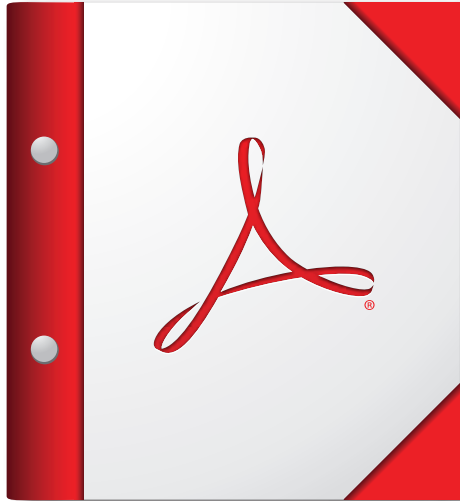

**For the best experience, open this PDF portfolio in  
Acrobat X or Adobe Reader X, or later.**

[Get Adobe Reader Now!](#)
